# Supplementary material for: How well do different tracers constrain the firn diffusivity profile?
Source: Copernicus journal article supplement (doi:10.5194/acp-13-1485-2013), 2013-02-06
Supplement: Supplementary file 1 [file NEEM08_EU_CSIROnew.xls]

## Sheet: Diffusivity
depth	Molec_diff	Eddy_diff
0	1.31428e-05	2.70776e-05
0.2	1.31373e-05	2.57642e-05
0.4	1.31319e-05	2.44507e-05
0.6	1.31266e-05	2.3171e-05
0.8	1.31223e-05	2.20349e-05
1	1.31181e-05	2.08988e-05
1.2	1.31142e-05	1.98287e-05
1.4	1.3111e-05	1.88431e-05
1.6	1.31077e-05	1.78575e-05
1.8	1.31051e-05	1.6967e-05
2	1.31027e-05	1.61095e-05
2.2	1.31004e-05	1.52628e-05
2.4	1.30987e-05	1.45148e-05
2.6	1.30971e-05	1.37668e-05
2.8	1.30957e-05	1.30661e-05
3	1.30946e-05	1.2412e-05
3.2	1.30935e-05	1.17579e-05
3.4	1.30929e-05	1.11809e-05
3.6	1.30923e-05	1.06076e-05
3.8	1.30918e-05	1.00656e-05
4	1.30915e-05	9.56195e-06
4.2	1.30911e-05	9.05828e-06
4.4	1.3091e-05	8.6141e-06
4.6	1.30909e-05	8.17068e-06
4.8	1.30909e-05	7.75675e-06
5	1.30909e-05	7.36558e-06
5.2	1.30909e-05	6.98255e-06
5.4	1.30908e-05	6.63682e-06
5.6	1.30908e-05	6.29108e-06
5.8	1.30907e-05	5.97821e-06
6	1.30905e-05	5.67206e-06
6.2	1.30903e-05	5.38374e-06
6.4	1.30899e-05	5.11218e-06
6.6	1.30895e-05	4.84769e-06
6.8	1.30889e-05	4.60639e-06
7	1.30882e-05	4.3651e-06
7.2	1.30872e-05	4.14991e-06
7.4	1.30861e-05	3.93517e-06
7.6	1.30847e-05	3.73824e-06
7.8	1.30832e-05	3.54682e-06
8	1.30813e-05	3.36717e-06
8.2	1.30793e-05	3.1963e-06
8.4	1.3077e-05	3.03285e-06
8.6	1.30743e-05	2.88011e-06
8.8	1.30714e-05	2.73173e-06
9	1.3068e-05	2.595e-06
9.2	1.30646e-05	2.46056e-06
9.4	1.30605e-05	2.33801e-06
9.6	1.30563e-05	2.2164e-06
9.8	1.30514e-05	2.10641e-06
10	1.30465e-05	1.99657e-06
10.2	1.30408e-05	1.89774e-06
10.4	1.30351e-05	1.79891e-06
10.6	1.30285e-05	1.70973e-06
10.8	1.30219e-05	1.62082e-06
11	1.30145e-05	1.54036e-06
11.2	1.3007e-05	1.46029e-06
11.4	1.29987e-05	1.38777e-06
11.6	1.29903e-05	1.31558e-06
11.8	1.29811e-05	1.2503e-06
12	1.29718e-05	1.18529e-06
12.2	1.29617e-05	1.12644e-06
12.4	1.29515e-05	1.06806e-06
12.6	1.29405e-05	1.01484e-06
12.8	1.29295e-05	9.62444e-07
13	1.29177e-05	9.14282e-07
13.2	1.29059e-05	8.67285e-07
13.4	1.28935e-05	8.23659e-07
13.6	1.28809e-05	7.81532e-07
13.8	1.28679e-05	7.41984e-07
14	1.28548e-05	7.04247e-07
14.2	1.28415e-05	6.68367e-07
14.4	1.2828e-05	6.34583e-07
14.6	1.28144e-05	6.02008e-07
14.8	1.28009e-05	5.71781e-07
15	1.27873e-05	5.42187e-07
15.2	1.2774e-05	5.1516e-07
15.4	1.27609e-05	4.88575e-07
15.6	1.27482e-05	4.64106e-07
15.8	1.27359e-05	4.40336e-07
16	1.27242e-05	4.18069e-07
16.2	1.27125e-05	3.96827e-07
16.4	1.27009e-05	3.76555e-07
16.6	1.2689e-05	3.57581e-07
16.8	1.26769e-05	3.39117e-07
17	1.26209e-05	3.22179e-07
17.2	1.25483e-05	3.0558e-07
17.4	1.24014e-05	2.90244e-07
17.6	1.22298e-05	2.75419e-07
17.8	1.20176e-05	2.61435e-07
18	1.17786e-05	2.48203e-07
18.2	1.15227e-05	2.35445e-07
18.4	1.12472e-05	2.23643e-07
18.6	1.09681e-05	2.12107e-07
18.8	1.06866e-05	2.01478e-07
19	1.04111e-05	1.91184e-07
19.2	1.01463e-05	1.81477e-07
19.4	9.90381e-06	1.72295e-07
19.6	9.67455e-06	1.63427e-07
19.8	9.48658e-06	1.55243e-07
20	9.30683e-06	1.4726e-07
20.2	9.14369e-06	1.39849e-07
20.4	8.98754e-06	1.3273e-07
20.6	8.83962e-06	1.25953e-07
20.8	8.70243e-06	1.19608e-07
21	8.56945e-06	1.13433e-07
21.2	8.44924e-06	1.07758e-07
21.4	8.33345e-06	1.02253e-07
21.6	8.2258e-06	9.70573e-08
21.8	8.12591e-06	9.21518e-08
22	8.02998e-06	8.7394e-08
22.2	7.94472e-06	8.30269e-08
22.4	7.86275e-06	7.87782e-08
22.6	7.78785e-06	7.4784e-08
22.8	7.71884e-06	7.09995e-08
23	7.6533e-06	6.73382e-08
23.2	7.59606e-06	6.39701e-08
23.4	7.54153e-06	6.06975e-08
23.6	7.49249e-06	5.76181e-08
23.8	7.44814e-06	5.47041e-08
24	7.40631e-06	5.18794e-08
24.2	7.37098e-06	4.92863e-08
24.4	7.33776e-06	4.67698e-08
24.6	7.30829e-06	4.43893e-08
24.8	7.28259e-06	4.21494e-08
25	7.25875e-06	3.99797e-08
25.2	7.23909e-06	3.79716e-08
25.4	7.22128e-06	3.60395e-08
25.6	7.20561e-06	3.41944e-08
25.8	7.19282e-06	3.24755e-08
26	7.18121e-06	3.08111e-08
26.2	7.17179e-06	2.92521e-08
26.4	7.16379e-06	2.77708e-08
26.6	7.15668e-06	2.63389e-08
26.8	7.15131e-06	2.50202e-08
27	7.14646e-06	2.37452e-08
27.2	7.14233e-06	2.25319e-08
27.4	7.13881e-06	2.13978e-08
27.6	7.13548e-06	2.03016e-08
27.8	7.13234e-06	1.92737e-08
28	7.12907e-06	1.82983e-08
28.2	7.12568e-06	1.73566e-08
28.4	7.12166e-06	1.64849e-08
28.6	7.11709e-06	1.56467e-08
28.8	7.11196e-06	1.48438e-08
29	7.10541e-06	1.40986e-08
29.2	7.09805e-06	1.33789e-08
29.4	7.08941e-06	1.2697e-08
29.6	7.07892e-06	1.2057e-08
29.8	7.06729e-06	1.14396e-08
30	7.05355e-06	1.08599e-08
30.2	7.0377e-06	1.03107e-08
30.4	7.02039e-06	9.78136e-09
30.6	7.00004e-06	9.28812e-09
30.8	6.97745e-06	8.81715e-09
31	6.95308e-06	8.36357e-09
31.2	6.92471e-06	7.94352e-09
31.4	6.89405e-06	7.53988e-09
31.6	6.86118e-06	7.15212e-09
31.8	6.82359e-06	6.79339e-09
32	6.78359e-06	6.44765e-09
32.2	6.74075e-06	6.11699e-09
32.4	6.6929e-06	5.80968e-09
32.6	6.64231e-06	5.51369e-09
32.8	6.58834e-06	5.23148e-09
33	6.52902e-06	4.96836e-09
33.2	6.46668e-06	4.71507e-09
33.4	6.40046e-06	4.47403e-09
33.6	6.32857e-06	4.24885e-09
33.8	6.25358e-06	4.03219e-09
34	6.17467e-06	3.82613e-09
34.2	6.09111e-06	3.63352e-09
34.4	6.00516e-06	3.44827e-09
34.6	5.91637e-06	3.27198e-09
34.8	5.82431e-06	3.10729e-09
35	5.73066e-06	2.94895e-09
35.2	5.63522e-06	2.79801e-09
35.4	5.53782e-06	2.65726e-09
35.6	5.43961e-06	2.52196e-09
35.8	5.34058e-06	2.39263e-09
36	5.24088e-06	2.27238e-09
36.2	5.14113e-06	2.15681e-09
36.4	5.04139e-06	2.04593e-09
36.6	4.94231e-06	1.94322e-09
36.8	4.84395e-06	1.84454e-09
37	4.74634e-06	1.74987e-09
37.2	4.65056e-06	1.6617e-09
37.4	4.55636e-06	1.57746e-09
37.6	4.46366e-06	1.49666e-09
37.8	4.37366e-06	1.42092e-09
38	4.28629e-06	1.34904e-09
38.2	4.20113e-06	1.28009e-09
38.4	4.11924e-06	1.21499e-09
38.6	4.04126e-06	1.15367e-09
38.8	3.96618e-06	1.09485e-09
39	3.89459e-06	1.03885e-09
39.2	3.82842e-06	9.8655e-10
39.4	3.76582e-06	9.36386e-10
39.6	3.70688e-06	8.88329e-10
39.8	3.65455e-06	8.43601e-10
40	3.60672e-06	8.00831e-10
40.2	3.56319e-06	7.59855e-10
40.4	3.52607e-06	7.21319e-10
40.6	3.49504e-06	6.84865e-10
40.8	3.46753e-06	6.49935e-10
41	3.44313e-06	6.16714e-10
41.2	3.42151e-06	5.85653e-10
41.4	3.40155e-06	5.55886e-10
41.6	3.38322e-06	5.27393e-10
41.8	3.36729e-06	5.00771e-10
42	3.35294e-06	4.75413e-10
42.2	3.33995e-06	4.51134e-10
42.4	3.32856e-06	4.28149e-10
42.6	3.31885e-06	4.06552e-10
42.8	3.31021e-06	3.85871e-10
43	3.30263e-06	3.66088e-10
43.2	3.29652e-06	3.47628e-10
43.4	3.29131e-06	3.30017e-10
43.6	3.28689e-06	3.13167e-10
43.8	3.28335e-06	2.97206e-10
44	3.28068e-06	2.82215e-10
44.2	3.27854e-06	2.67867e-10
44.4	3.27689e-06	2.54148e-10
44.6	3.27585e-06	2.41302e-10
44.8	3.27516e-06	2.2909e-10
45	3.27472e-06	2.17409e-10
45.2	3.2745e-06	2.06287e-10
45.4	3.27445e-06	1.95896e-10
45.6	3.27443e-06	1.85954e-10
45.8	3.27439e-06	1.76451e-10
46	3.27425e-06	1.67482e-10
46.2	3.27389e-06	1.59024e-10
46.4	3.27329e-06	1.50936e-10
46.6	3.27242e-06	1.43208e-10
46.8	3.27106e-06	1.35968e-10
47	3.2692e-06	1.29087e-10
47.2	3.26686e-06	1.2251e-10
47.4	3.26401e-06	1.1623e-10
47.6	3.26023e-06	1.10378e-10
47.8	3.25576e-06	1.04783e-10
48	3.25058e-06	9.94384e-11
48.2	3.24457e-06	9.43575e-11
48.4	3.23736e-06	8.96007e-11
48.6	3.22924e-06	8.50545e-11
48.8	3.22018e-06	8.07126e-11
49	3.20998e-06	7.65985e-11
49.2	3.19833e-06	7.27333e-11
49.4	3.18558e-06	6.90403e-11
49.6	3.17167e-06	6.55144e-11
49.8	3.15632e-06	6.21798e-11
50	3.13932e-06	5.90403e-11
50.2	3.121e-06	5.60416e-11
50.4	3.10133e-06	5.31792e-11
50.6	3.07997e-06	5.04737e-11
50.8	3.05673e-06	4.79247e-11
51	3.03198e-06	4.54906e-11
51.2	3.00569e-06	4.31676e-11
51.4	2.97752e-06	4.09702e-11
51.6	2.94721e-06	3.89014e-11
51.8	2.91522e-06	3.69263e-11
52	2.8815e-06	3.50416e-11
52.2	2.84577e-06	3.32552e-11
52.4	2.80762e-06	3.15767e-11
52.6	2.76761e-06	2.99744e-11
52.8	2.7257e-06	2.84457e-11
53	2.68174e-06	2.69921e-11
53.2	2.635e-06	2.56307e-11
53.4	2.58624e-06	2.43312e-11
53.6	2.53541e-06	2.30916e-11
53.8	2.48249e-06	2.19096e-11
54	2.42654e-06	2.08038e-11
54.2	2.36832e-06	1.97503e-11
54.4	2.30787e-06	1.87453e-11
54.6	2.24517e-06	1.77871e-11
54.8	2.17952e-06	1.68854e-11
55	2.11116e-06	1.60314e-11
55.2	2.04042e-06	1.52169e-11
55.4	1.96725e-06	1.44402e-11
55.6	1.89132e-06	1.37044e-11
55.8	1.81214e-06	1.30124e-11
56	1.73042e-06	1.23523e-11
56.2	1.64608e-06	1.1723e-11
56.4	1.55898e-06	1.11233e-11
56.6	1.46579e-06	1.05614e-11
56.8	1.3686e-06	1.00266e-11
57	1.26882e-06	9.51678e-12
57.2	1.16761e-06	9.03091e-12
57.4	1.06642e-06	8.57145e-12
57.6	9.67597e-07	8.13836e-12
57.8	8.72261e-07	7.72542e-12
58	7.81546e-07	7.33186e-12
58.2	6.96594e-07	6.95694e-12
58.4	6.21557e-07	6.60521e-12
58.6	5.55319e-07	6.27083e-12
58.8	4.969e-07	5.95213e-12
59	4.45818e-07	5.64849e-12
59.2	4.02012e-07	5.36038e-12
59.4	3.65828e-07	5.08969e-12
59.6	3.34757e-07	4.83167e-12
59.8	3.08279e-07	4.58581e-12
60	2.8587e-07	4.35164e-12
60.2	2.67473e-07	4.13057e-12
60.4	2.52098e-07	3.92173e-12
60.6	2.38608e-07	3.72272e-12
60.8	2.26475e-07	3.53314e-12
61	2.15167e-07	3.35261e-12
61.2	2.03957e-07	3.18277e-12
61.4	1.91914e-07	3.02171e-12
61.6	1.78483e-07	2.86828e-12
61.8	1.63111e-07	2.72214e-12
62	1.45237e-07	2.58301e-12
62.2	1.2309e-07	2.45236e-12
62.4	9.65666e-08	2.32821e-12
62.6	6.771e-08	2.20995e-12
62.8	4.0353e-08	2.09734e-12
63	1.99147e-08	1.99015e-12
63.2	1.58073e-08	1.88952e-12
63.4	1.41301e-08	1.79385e-12
63.6	1.33612e-08	1.70273e-12
63.8	1.28757e-08	1.61598e-12
64	1.26111e-08	1.53341e-12
64.2	1.25133e-08	1.45583e-12
64.4	1.24511e-08	1.38212e-12
64.6	1.23491e-08	1.31194e-12
64.8	1.21373e-08	1.24512e-12
65	1.17436e-08	1.18153e-12
65.2	1.10086e-08	1.12164e-12
65.4	9.84226e-09	1.06488e-12
65.6	8.18857e-09	1.01083e-12
65.8	6.08175e-09	9.59385e-13
66	3.87694e-09	9.10422e-13
66.2	3.22408e-09	8.64146e-13
66.4	3.13268e-09	8.20443e-13
66.6	3.11252e-09	7.78832e-13
66.8	3.09643e-09	7.39224e-13
67	3.08402e-09	7.01531e-13
67.2	3.07502e-09	6.65736e-13
67.4	3.06941e-09	6.32096e-13
67.6	3.06591e-09	6.00067e-13
67.8	3.06403e-09	5.69581e-13
68	3.06329e-09	5.4057e-13
68.2	3.06316e-09	5.1297e-13
68.4	3.06291e-09	4.86966e-13
68.6	3.06162e-09	4.6232e-13
68.8	3.0586e-09	4.3886e-13
69	3.05315e-09	4.16536e-13
69.2	3.04448e-09	3.95297e-13
69.4	3.03154e-09	3.75137e-13
69.6	3.012e-09	3.56176e-13
69.8	2.98576e-09	3.38127e-13
70	2.9517e-09	3.20951e-13
70.2	2.9086e-09	3.0461e-13
70.4	2.85515e-09	2.89067e-13
70.6	2.78798e-09	2.74383e-13
70.8	2.70472e-09	2.605e-13
71	2.6051e-09	2.47289e-13
71.2	2.48714e-09	2.34719e-13
71.4	2.29918e-09	2.22762e-13
71.6	1.94748e-09	2.1139e-13
71.8	1.57699e-09	2.00679e-13
72	1.47343e-09	1.9052e-13
72.2	1.42539e-09	1.80852e-13
72.4	1.38445e-09	1.71656e-13
72.6	1.35034e-09	1.62909e-13
72.8	1.32275e-09	1.54592e-13
73	1.3025e-09	1.46768e-13
73.2	1.28773e-09	1.39336e-13
73.4	1.27764e-09	1.32264e-13
73.6	1.27149e-09	1.25538e-13
73.8	1.26844e-09	1.19141e-13
74	1.26755e-09	1.13058e-13
74.2	1.26743e-09	1.07337e-13
74.4	1.26606e-09	1.01901e-13
74.6	1.2617e-09	9.67296e-14
74.8	1.25239e-09	9.1811e-14
75	1.23594e-09	8.71338e-14
75.2	1.20983e-09	8.26868e-14
75.4	1.16791e-09	7.84975e-14
75.6	1.10714e-09	7.45226e-14
75.8	1.02402e-09	7.07417e-14
76	5.93069e-10	6.71458e-14
76.2	0	6.37266e-14
76.4	0	6.04759e-14
76.6	0	5.74047e-14
76.8	0	5.44991e-14
77	0	5.17354e-14
77.2	0	4.91071e-14
77.4	0	4.6608e-14
77.6	0	4.42321e-14
77.8	0	4.1978e-14
78	0	3.98545e-14
78.2	0	3.78348e-14
78.4	0	3.59141e-14
78.6	0	3.40879e-14
78.8	0	3.23516e-14
79	0	3.07013e-14
79.2	0	2.9144e-14
79.4	0	2.76683e-14
79.6	0	2.62649e-14
79.8	0	2.49306e-14
80	0	2.36621e-14
80.2	0	2.24562e-14
80.4	0	2.13106e-14
80.6	0	2.02326e-14
80.8	0	1.92075e-14
81	0	1.82328e-14
81.2	0	1.7306e-14
81.4	0	1.64251e-14
81.6	0	1.55879e-14
81.8	0	1.47943e-14
82	0	1.40456e-14
82.2	0	1.33337e-14
82.4	0	1.26568e-14
82.6	0	1.20134e-14
82.8	0	1.14018e-14
83	0	1.08205e-14
83.2	0	1.02701e-14
83.4	0	9.75024e-15
83.6	0	9.25597e-15
83.8	0	8.78608e-15
84	0	8.33943e-15
84.2	0	7.91491e-15
84.4	0	7.51147e-15
84.6	0	7.12918e-15
84.8	0	6.76832e-15

## Sheet: profiles
depth	CO2	CH4	SF6	CFC11	CFC12	CFC113	HFC134a	CH3CCl3	14CO2	15N2	CCl4
0	382.39	1837.16	6.647	245.83	536.85	78.122	52.82	11.332	487.221	1	91.67
0.2	382.485	1837.38	6.64558	245.843	536.861	78.1261	52.79	11.3542	487.352	1	91.6778
0.4	382.58	1837.6	6.64417	245.856	536.872	78.1301	52.76	11.3763	487.483	1	91.6856
0.6	382.679	1837.83	6.64251	245.87	536.884	78.1347	52.7264	11.4022	487.621	1	91.6945
0.8	382.779	1838.06	6.64082	245.885	536.896	78.1393	52.6921	11.4286	487.76	1	91.7036
1	382.879	1838.3	6.63912	245.9	536.909	78.1439	52.6578	11.4551	487.899	1	91.7126
1.2	382.98	1838.54	6.63736	245.915	536.921	78.1487	52.6226	11.4826	488.04	1	91.722
1.4	383.083	1838.78	6.63548	245.932	536.935	78.1537	52.5856	11.512	488.182	1	91.7319
1.6	383.186	1839.02	6.6336	245.948	536.948	78.1586	52.5486	11.5414	488.325	1	91.7418
1.8	383.29	1839.27	6.63158	245.965	536.961	78.1638	52.5098	11.5729	488.469	1	91.7522
2	383.394	1839.53	6.6295	245.983	536.975	78.1692	52.47	11.6054	488.615	1	91.7629
2.2	383.498	1839.78	6.62742	246	536.989	78.1745	52.4302	11.638	488.76	1	91.7737
2.4	383.604	1840.04	6.62514	246.019	537.004	78.1801	52.3877	11.6738	488.907	1.00001	91.7852
2.6	383.709	1840.3	6.62285	246.038	537.018	78.1858	52.3452	11.7095	489.054	1.00001	91.7968
2.8	383.814	1840.56	6.62048	246.058	537.033	78.1916	52.3016	11.7467	489.201	1.00001	91.8088
3	383.919	1840.82	6.61798	246.078	537.049	78.1976	52.2565	11.7858	489.348	1.00001	91.8212
3.2	384.025	1841.08	6.61549	246.098	537.064	78.2035	52.2113	11.825	489.496	1.00001	91.8337
3.4	384.129	1841.35	6.61281	246.12	537.08	78.2098	52.1638	11.8671	489.643	1.00001	91.8468
3.6	384.234	1841.62	6.6101	246.142	537.096	78.216	52.1161	11.9097	489.79	1.00001	91.8601
3.8	384.338	1841.89	6.60731	246.164	537.112	78.2224	52.0674	11.9535	489.936	1.00001	91.8737
4	384.441	1842.16	6.60439	246.187	537.128	78.229	52.0171	11.9997	490.081	1.00001	91.8879
4.2	384.544	1842.43	6.60146	246.21	537.144	78.2355	51.9668	12.0458	490.226	1.00001	91.902
4.4	384.645	1842.7	6.59834	246.234	537.161	78.2423	51.9143	12.0951	490.369	1.00001	91.9169
4.6	384.745	1842.97	6.5952	246.258	537.178	78.2491	51.8616	12.1448	490.512	1.00001	91.9319
4.8	384.845	1843.24	6.59195	246.283	537.195	78.256	51.8078	12.1962	490.653	1.00001	91.9472
5	384.943	1843.51	6.5886	246.309	537.212	78.2631	51.7528	12.2494	490.793	1.00001	91.963
5.2	385.04	1843.78	6.58522	246.334	537.229	78.2701	51.6975	12.303	490.932	1.00001	91.9789
5.4	385.135	1844.05	6.58166	246.361	537.246	78.2774	51.6404	12.3599	491.067	1.00001	91.9954
5.6	385.229	1844.32	6.57809	246.388	537.264	78.2846	51.5832	12.4167	491.202	1.00001	92.012
5.8	385.321	1844.59	6.57437	246.415	537.281	78.292	51.5245	12.4762	491.334	1.00002	92.0291
6	385.411	1844.86	6.57059	246.443	537.298	78.2994	51.4652	12.5366	491.465	1.00002	92.0464
6.2	385.5	1845.12	6.56673	246.471	537.316	78.3068	51.4052	12.5985	491.593	1.00002	92.064
6.4	385.586	1845.39	6.56276	246.5	537.333	78.3144	51.344	12.6624	491.719	1.00002	92.082
6.6	385.672	1845.65	6.55875	246.528	537.351	78.3219	51.2826	12.7269	491.843	1.00002	92.1002
6.8	385.753	1845.91	6.55458	246.558	537.368	78.3296	51.2196	12.7943	491.963	1.00002	92.1189
7	385.835	1846.17	6.55041	246.588	537.385	78.3372	51.1567	12.8616	492.083	1.00002	92.1376
7.2	385.912	1846.43	6.54608	246.618	537.402	78.3449	51.0922	12.932	492.197	1.00002	92.1569
7.4	385.988	1846.69	6.54172	246.649	537.42	78.3526	51.0276	13.0028	492.311	1.00002	92.1762
7.6	386.061	1846.94	6.53725	246.68	537.437	78.3604	50.9619	13.0758	492.421	1.00002	92.196
7.8	386.133	1847.19	6.53272	246.711	537.453	78.3681	50.8957	13.1498	492.528	1.00002	92.2159
8	386.202	1847.44	6.5281	246.742	537.47	78.3759	50.8288	13.2254	492.633	1.00002	92.2361
8.2	386.268	1847.68	6.52341	246.774	537.487	78.3837	50.7612	13.3026	492.734	1.00002	92.2566
8.4	386.332	1847.92	6.51865	246.806	537.503	78.3915	50.6931	13.3808	492.833	1.00003	92.2773
8.6	386.393	1848.16	6.5138	246.839	537.519	78.3992	50.6242	13.4611	492.928	1.00003	92.2984
8.8	386.453	1848.4	6.50891	246.871	537.535	78.407	50.555	13.542	493.022	1.00003	92.3195
9	386.508	1848.63	6.50391	246.904	537.551	78.4147	50.4847	13.6253	493.11	1.00003	92.341
9.2	386.563	1848.86	6.49889	246.937	537.567	78.4225	50.4144	13.7088	493.198	1.00003	92.3626
9.4	386.614	1849.09	6.49374	246.971	537.582	78.4301	50.343	13.7949	493.28	1.00003	92.3846
9.6	386.664	1849.31	6.4886	247.004	537.597	78.4378	50.2716	13.881	493.363	1.00003	92.4066
9.8	386.709	1849.53	6.48333	247.038	537.611	78.4454	50.1991	13.9698	493.439	1.00003	92.429
10	386.754	1849.75	6.47805	247.072	537.626	78.453	50.1267	14.0587	493.515	1.00003	92.4514
10.2	386.794	1849.96	6.47266	247.106	537.64	78.4605	50.0532	14.15	493.585	1.00003	92.4741
10.4	386.833	1850.17	6.46727	247.14	537.654	78.468	49.9797	14.2415	493.655	1.00003	92.4969
10.6	386.869	1850.38	6.46177	247.174	537.667	78.4754	49.9053	14.3352	493.719	1.00003	92.52
10.8	386.903	1850.58	6.45627	247.209	537.68	78.4828	49.8309	14.4292	493.783	1.00004	92.5432
11	386.934	1850.78	6.45067	247.243	537.693	78.4901	49.7556	14.5253	493.842	1.00004	92.5666
11.2	386.964	1850.98	6.44506	247.278	537.705	78.4974	49.6802	14.6217	493.9	1.00004	92.5901
11.4	386.989	1851.17	6.43937	247.313	537.717	78.5045	49.6041	14.7201	493.954	1.00004	92.6138
11.6	387.014	1851.36	6.43366	247.347	537.729	78.5117	49.5278	14.8188	494.007	1.00004	92.6376
11.8	387.035	1851.54	6.42788	247.382	537.74	78.5187	49.4508	14.9195	494.055	1.00004	92.6616
12	387.056	1851.73	6.42209	247.417	537.751	78.5257	49.3738	15.0204	494.102	1.00004	92.6857
12.2	387.072	1851.9	6.41622	247.452	537.761	78.5325	49.296	15.1233	494.145	1.00004	92.7099
12.4	387.088	1852.08	6.41035	247.486	537.771	78.5393	49.2181	15.2263	494.187	1.00004	92.7343
12.6	387.099	1852.24	6.40441	247.521	537.78	78.546	49.1395	15.3312	494.224	1.00004	92.7588
12.8	387.111	1852.41	6.39846	247.556	537.79	78.5526	49.0609	15.4364	494.262	1.00004	92.7833
13	387.119	1852.57	6.39245	247.591	537.798	78.5591	48.9816	15.5432	494.294	1.00005	92.8081
13.2	387.125	1852.73	6.38643	247.626	537.807	78.5656	48.9022	15.6504	494.327	1.00005	92.8328
13.4	387.129	1852.89	6.38036	247.66	537.814	78.5719	48.8223	15.7591	494.355	1.00005	92.8577
13.6	387.132	1853.04	6.37428	247.695	537.822	78.5782	48.7422	15.8683	494.383	1.00005	92.8827
13.8	387.132	1853.19	6.36816	247.73	537.828	78.5843	48.6617	15.9786	494.407	1.00005	92.9078
14	387.13	1853.33	6.36202	247.764	537.835	78.5903	48.5809	16.0896	494.43	1.00005	92.9329
14.2	387.127	1853.47	6.35586	247.799	537.841	78.5963	48.4998	16.2016	494.45	1.00005	92.9581
14.4	387.121	1853.61	6.34968	247.833	537.846	78.6021	48.4184	16.3143	494.469	1.00005	92.9834
14.6	387.114	1853.74	6.34347	247.868	537.852	78.6079	48.3368	16.4278	494.485	1.00005	93.0087
14.8	387.105	1853.87	6.33725	247.902	537.856	78.6135	48.2549	16.5421	494.5	1.00005	93.0341
15	387.095	1854	6.33102	247.936	537.86	78.619	48.1728	16.6569	494.513	1.00005	93.0595
15.2	387.082	1854.12	6.32477	247.97	537.864	78.6244	48.0904	16.7727	494.523	1.00006	93.0849
15.4	387.069	1854.24	6.31851	248.004	537.867	78.6297	48.0079	16.8888	494.533	1.00006	93.1104
15.6	387.053	1854.35	6.31225	248.038	537.87	78.6349	47.9252	17.0058	494.54	1.00006	93.1358
15.8	387.036	1854.46	6.30598	248.071	537.872	78.6399	47.8424	17.123	494.546	1.00006	93.1613
16	387.017	1854.57	6.29971	248.104	537.874	78.6449	47.7595	17.241	494.55	1.00006	93.1868
16.2	386.997	1854.67	6.29344	248.138	537.875	78.6497	47.6765	17.3593	494.553	1.00006	93.2122
16.4	386.976	1854.77	6.28717	248.171	537.876	78.6544	47.5934	17.478	494.554	1.00006	93.2376
16.6	386.953	1854.87	6.28091	248.203	537.876	78.659	47.5103	17.5971	494.554	1.00006	93.263
16.8	386.93	1854.96	6.27465	248.236	537.876	78.6635	47.4271	17.7165	494.552	1.00006	93.2883
17	386.904	1855.05	6.26839	248.268	537.876	78.6678	47.3438	17.8366	494.549	1.00006	93.3137
17.2	386.878	1855.14	6.26212	248.301	537.875	78.672	47.2603	17.9571	494.545	1.00007	93.339
17.4	386.85	1855.22	6.25579	248.333	537.873	78.6761	47.1757	18.0796	494.539	1.00007	93.3646
17.6	386.821	1855.3	6.24941	248.365	537.871	78.6802	47.0905	18.2031	494.532	1.00007	93.3903
17.8	386.789	1855.38	6.24294	248.398	537.869	78.6842	47.0038	18.3291	494.524	1.00007	93.4165
18	386.757	1855.45	6.23636	248.431	537.865	78.6882	46.9156	18.4577	494.515	1.00007	93.443
18.2	386.723	1855.53	6.2297	248.465	537.862	78.6921	46.826	18.5884	494.504	1.00007	93.4698
18.4	386.686	1855.6	6.22284	248.499	537.858	78.6959	46.7336	18.7236	494.491	1.00007	93.4974
18.6	386.649	1855.67	6.21593	248.533	537.853	78.6997	46.6403	18.8602	494.478	1.00007	93.5253
18.8	386.608	1855.74	6.20874	248.568	537.847	78.7034	46.5431	19.003	494.463	1.00007	93.5541
19	386.566	1855.8	6.20148	248.604	537.841	78.7072	46.4447	19.1477	494.447	1.00007	93.5833
19.2	386.522	1855.87	6.19401	248.64	537.835	78.7108	46.3433	19.2972	494.429	1.00007	93.6133
19.4	386.475	1855.93	6.18639	248.677	537.827	78.7144	46.2396	19.4504	494.409	1.00008	93.6439
19.6	386.428	1855.99	6.17864	248.714	537.819	78.7179	46.1341	19.6065	494.389	1.00008	93.675
19.8	386.377	1856.05	6.1707	248.752	537.81	78.7213	46.0255	19.7674	494.367	1.00008	93.7068
20	386.326	1856.1	6.1627	248.79	537.8	78.7247	45.916	19.9299	494.344	1.00008	93.7388
20.2	386.272	1856.15	6.15451	248.829	537.79	78.7279	45.8037	20.0972	494.319	1.00008	93.7715
20.4	386.216	1856.2	6.14625	248.868	537.779	78.7311	45.6902	20.2664	494.293	1.00008	93.8046
20.6	386.16	1856.24	6.13788	248.907	537.767	78.7341	45.5749	20.4387	494.266	1.00008	93.838
20.8	386.101	1856.29	6.12938	248.947	537.754	78.737	45.4576	20.6143	494.238	1.00008	93.8719
21	386.041	1856.33	6.12083	248.986	537.741	78.7398	45.3394	20.7914	494.21	1.00008	93.906
21.2	385.979	1856.36	6.11212	249.026	537.726	78.7425	45.2186	20.9729	494.179	1.00008	93.9407
21.4	385.917	1856.4	6.10337	249.066	537.711	78.745	45.0972	21.1558	494.148	1.00008	93.9755
21.6	385.852	1856.42	6.09452	249.107	537.696	78.7474	44.9739	21.3417	494.116	1.00009	94.0108
21.8	385.787	1856.45	6.08559	249.147	537.679	78.7497	44.8494	21.5299	494.083	1.00009	94.0462
22	385.72	1856.47	6.07661	249.188	537.662	78.7518	44.724	21.7198	494.049	1.00009	94.0819
22.2	385.652	1856.49	6.06752	249.228	537.644	78.7538	44.5968	21.9129	494.015	1.00009	94.1179
22.4	385.583	1856.51	6.05841	249.269	537.625	78.7556	44.4691	22.107	493.979	1.00009	94.154
22.6	385.513	1856.52	6.04923	249.31	537.605	78.7572	44.3401	22.3037	493.943	1.00009	94.1904
22.8	385.443	1856.53	6.04	249.35	537.585	78.7587	44.2102	22.502	493.907	1.00009	94.2269
23	385.371	1856.54	6.03074	249.391	537.564	78.7601	44.0797	22.7016	493.87	1.00009	94.2635
23.2	385.299	1856.55	6.02143	249.431	537.542	78.7613	43.9481	22.9034	493.832	1.00009	94.3002
23.4	385.226	1856.55	6.0121	249.472	537.519	78.7623	43.8162	23.1061	493.795	1.00009	94.337
23.6	385.153	1856.54	6.00274	249.512	537.496	78.7631	43.6835	23.3104	493.756	1.0001	94.3738
23.8	385.079	1856.54	5.99336	249.552	537.472	78.7638	43.5504	23.5158	493.718	1.0001	94.4107
24	385.004	1856.53	5.98398	249.592	537.448	78.7643	43.417	23.722	493.679	1.0001	94.4476
24.2	384.93	1856.52	5.97458	249.632	537.422	78.7646	43.2831	23.9296	493.64	1.0001	94.4845
24.4	384.855	1856.51	5.96518	249.672	537.396	78.7648	43.1491	24.1378	493.601	1.0001	94.5213
24.6	384.78	1856.49	5.95578	249.711	537.369	78.7647	43.0148	24.3468	493.561	1.0001	94.5581
24.8	384.705	1856.47	5.94639	249.75	537.342	78.7645	42.8805	24.5565	493.522	1.0001	94.5948
25	384.629	1856.45	5.937	249.789	537.314	78.7642	42.7461	24.7665	493.483	1.0001	94.6314
25.2	384.554	1856.43	5.92764	249.828	537.286	78.7636	42.6118	24.9772	493.444	1.0001	94.6679
25.4	384.479	1856.4	5.91829	249.866	537.257	78.7629	42.4775	25.1881	493.404	1.0001	94.7043
25.6	384.404	1856.38	5.90896	249.904	537.227	78.762	42.3434	25.3993	493.365	1.0001	94.7405
25.8	384.329	1856.34	5.89966	249.941	537.197	78.7609	42.2095	25.6108	493.327	1.00011	94.7766
26	384.254	1856.31	5.89038	249.979	537.166	78.7597	42.0758	25.8223	493.288	1.00011	94.8125
26.2	384.179	1856.28	5.88114	250.015	537.135	78.7582	41.9425	26.0339	493.249	1.00011	94.8483
26.4	384.105	1856.24	5.87193	250.052	537.103	78.7566	41.8094	26.2455	493.211	1.00011	94.8838
26.6	384.031	1856.2	5.86274	250.088	537.07	78.7548	41.6766	26.4571	493.173	1.00011	94.9193
26.8	383.958	1856.16	5.85361	250.124	537.037	78.7528	41.5444	26.6685	493.136	1.00011	94.9544
27	383.885	1856.12	5.8445	250.16	537.004	78.7507	41.4125	26.8798	493.098	1.00011	94.9894
27.2	383.812	1856.08	5.83544	250.195	536.97	78.7484	41.2811	27.0909	493.061	1.00011	95.0242
27.4	383.74	1856.03	5.82642	250.229	536.936	78.7459	41.1502	27.3018	493.025	1.00011	95.0587
27.6	383.668	1855.99	5.81742	250.264	536.901	78.7433	41.0196	27.5126	492.988	1.00011	95.0931
27.8	383.596	1855.94	5.80848	250.298	536.866	78.7405	40.8897	27.723	492.952	1.00012	95.1272
28	383.526	1855.89	5.79958	250.331	536.83	78.7375	40.7602	27.9331	492.917	1.00012	95.1611
28.2	383.455	1855.84	5.79071	250.364	536.794	78.7344	40.6311	28.1431	492.882	1.00012	95.1948
28.4	383.385	1855.79	5.7819	250.397	536.757	78.731	40.5028	28.3527	492.847	1.00012	95.2282
28.6	383.316	1855.73	5.77311	250.429	536.72	78.7275	40.3748	28.5621	492.813	1.00012	95.2615
28.8	383.247	1855.68	5.76436	250.462	536.683	78.7238	40.2473	28.7713	492.779	1.00012	95.2945
29	383.179	1855.62	5.75567	250.493	536.645	78.7199	40.1204	28.9801	492.746	1.00012	95.3273
29.2	383.111	1855.57	5.74699	250.524	536.607	78.7159	39.9938	29.1888	492.713	1.00012	95.36
29.4	383.044	1855.51	5.73836	250.555	536.568	78.7117	39.8678	29.3973	492.681	1.00012	95.3924
29.6	382.978	1855.45	5.72977	250.586	536.528	78.7074	39.7423	29.6056	492.649	1.00012	95.4246
29.8	382.912	1855.39	5.7212	250.616	536.489	78.7029	39.6171	29.8139	492.617	1.00013	95.4566
30	382.846	1855.33	5.71266	250.646	536.448	78.6981	39.4924	30.022	492.586	1.00013	95.4885
30.2	382.781	1855.27	5.70416	250.676	536.408	78.6932	39.3681	30.23	492.555	1.00013	95.5201
30.4	382.716	1855.21	5.69567	250.705	536.366	78.6882	39.244	30.4381	492.525	1.00013	95.5517
30.6	382.652	1855.15	5.68722	250.734	536.325	78.6829	39.1204	30.6463	492.495	1.00013	95.583
30.8	382.589	1855.08	5.67878	250.762	536.282	78.6775	38.997	30.8546	492.466	1.00013	95.6142
31	382.525	1855.02	5.67036	250.791	536.24	78.6719	38.8738	31.063	492.437	1.00013	95.6453
31.2	382.463	1854.95	5.66196	250.819	536.196	78.666	38.7509	31.2718	492.408	1.00013	95.6762
31.4	382.4	1854.89	5.65357	250.847	536.153	78.66	38.6281	31.4809	492.38	1.00013	95.707
31.6	382.338	1854.82	5.64519	250.874	536.108	78.6539	38.5054	31.6904	492.353	1.00013	95.7378
31.8	382.277	1854.75	5.63681	250.901	536.063	78.6474	38.3828	31.9005	492.325	1.00013	95.7684
32	382.215	1854.69	5.62843	250.928	536.017	78.6408	38.2602	32.1111	492.298	1.00014	95.7989
32.2	382.154	1854.62	5.62005	250.955	535.971	78.6341	38.1375	32.3224	492.272	1.00014	95.8294
32.4	382.094	1854.55	5.61166	250.981	535.924	78.627	38.0148	32.5348	492.246	1.00014	95.8599
32.6	382.033	1854.48	5.60326	251.008	535.876	78.6198	37.8919	32.7479	492.22	1.00014	95.8903
32.8	381.973	1854.41	5.59484	251.034	535.828	78.6123	37.7687	32.9619	492.194	1.00014	95.9207
33	381.913	1854.34	5.5864	251.059	535.779	78.6045	37.6452	33.1776	492.169	1.00014	95.9511
33.2	381.853	1854.26	5.57793	251.085	535.729	78.5966	37.5214	33.3942	492.144	1.00014	95.9815
33.4	381.793	1854.19	5.56943	251.111	535.678	78.5884	37.3971	33.6124	492.12	1.00014	96.012
33.6	381.734	1854.12	5.56088	251.136	535.626	78.5799	37.2721	33.8327	492.096	1.00014	96.0425
33.8	381.674	1854.04	5.55229	251.161	535.573	78.5712	37.1466	34.0543	492.072	1.00014	96.0731
34	381.615	1853.96	5.54365	251.186	535.52	78.5621	37.0203	34.278	492.048	1.00015	96.1038
34.2	381.555	1853.89	5.53494	251.211	535.465	78.5528	36.893	34.5045	492.025	1.00015	96.1347
34.4	381.496	1853.81	5.52617	251.236	535.409	78.5431	36.7649	34.7327	492.002	1.00015	96.1657
34.6	381.436	1853.73	5.51733	251.261	535.352	78.5332	36.6359	34.9636	491.979	1.00015	96.1969
34.8	381.376	1853.65	5.50839	251.286	535.293	78.5228	36.5054	35.1979	491.957	1.00015	96.2283
35	381.316	1853.57	5.49938	251.31	535.233	78.5122	36.374	35.4344	491.935	1.00015	96.2599
35.2	381.256	1853.49	5.49028	251.335	535.172	78.5012	36.2413	35.674	491.912	1.00015	96.2917
35.4	381.195	1853.4	5.48106	251.359	535.11	78.4897	36.1069	35.9177	491.891	1.00015	96.3238
35.6	381.134	1853.32	5.47176	251.384	535.046	78.4779	35.9714	36.164	491.869	1.00015	96.3562
35.8	381.073	1853.23	5.46235	251.408	534.981	78.4658	35.8344	36.4137	491.848	1.00015	96.3888
36	381.012	1853.15	5.4528	251.433	534.913	78.4531	35.6953	36.6683	491.827	1.00015	96.4218
36.2	380.95	1853.06	5.44315	251.457	534.844	78.44	35.5549	36.9259	491.806	1.00016	96.455
36.4	380.888	1852.97	5.43339	251.481	534.774	78.4266	35.4131	37.187	491.785	1.00016	96.4885
36.6	380.825	1852.88	5.42346	251.506	534.702	78.4124	35.2687	37.4539	491.765	1.00016	96.5225
36.8	380.762	1852.78	5.41342	251.53	534.628	78.398	35.1229	37.7242	491.745	1.00016	96.5568
37	380.699	1852.69	5.40327	251.554	534.552	78.3831	34.9756	37.9978	491.725	1.00016	96.5913
37.2	380.635	1852.59	5.39293	251.578	534.474	78.3674	34.8255	38.278	491.705	1.00016	96.6264
37.4	380.571	1852.5	5.38246	251.602	534.394	78.3514	34.6738	38.562	491.686	1.00016	96.6618
37.6	380.507	1852.4	5.37189	251.626	534.312	78.3349	34.5205	38.8495	491.667	1.00016	96.6974
37.8	380.441	1852.3	5.36112	251.65	534.228	78.3177	34.3646	39.1433	491.648	1.00016	96.7336
38	380.376	1852.2	5.35022	251.674	534.142	78.2999	34.2069	39.4415	491.63	1.00016	96.7701
38.2	380.31	1852.1	5.3392	251.697	534.054	78.2817	34.0475	39.7434	491.612	1.00017	96.8069
38.4	380.244	1852	5.32802	251.721	533.964	78.2628	33.8859	40.0508	491.594	1.00017	96.8441
38.6	380.177	1851.89	5.31669	251.744	533.871	78.2432	33.7222	40.3632	491.576	1.00017	96.8817
38.8	380.11	1851.79	5.30524	251.767	533.777	78.2232	33.5571	40.6791	491.559	1.00017	96.9195
39	380.043	1851.68	5.29367	251.79	533.68	78.2026	33.3902	40.9995	491.542	1.00017	96.9576
39.2	379.975	1851.58	5.28195	251.813	533.581	78.1812	33.2212	41.3251	491.526	1.00017	96.9961
39.4	379.907	1851.47	5.27013	251.835	533.48	78.1594	33.0511	41.6537	491.51	1.00017	97.0348
39.6	379.839	1851.36	5.25823	251.858	533.378	78.1371	32.8798	41.9856	491.494	1.00017	97.0736
39.8	379.771	1851.25	5.24619	251.879	533.273	78.114	32.7068	42.3221	491.479	1.00017	97.1127
40	379.703	1851.15	5.2341	251.901	533.167	78.0905	32.5331	42.6609	491.464	1.00017	97.1519
40.2	379.634	1851.04	5.22196	251.922	533.059	78.0666	32.3587	43.0018	491.449	1.00017	97.1911
40.4	379.566	1850.93	5.20975	251.943	532.949	78.042	32.1836	43.3454	491.435	1.00018	97.2304
40.6	379.499	1850.82	5.19753	251.963	532.839	78.0171	32.0084	43.6903	491.422	1.00018	97.2696
40.8	379.431	1850.71	5.18529	251.982	532.727	77.9917	31.8332	44.036	491.409	1.00018	97.3087
41	379.364	1850.6	5.17306	252.002	532.614	77.966	31.6582	44.3824	491.397	1.00018	97.3476
41.2	379.297	1850.5	5.16085	252.02	532.499	77.9398	31.4836	44.7293	491.385	1.00018	97.3863
41.4	379.231	1850.39	5.14865	252.038	532.384	77.9133	31.3094	45.0762	491.373	1.00018	97.4249
41.6	379.165	1850.29	5.13648	252.056	532.269	77.8866	31.1356	45.4231	491.362	1.00018	97.4633
41.8	379.1	1850.18	5.12435	252.072	532.152	77.8594	30.9627	45.7696	491.352	1.00018	97.5013
42	379.035	1850.08	5.11227	252.089	532.034	77.832	30.7904	46.1156	491.341	1.00018	97.5391
42.2	378.971	1849.98	5.10022	252.104	531.917	77.8043	30.6189	46.461	491.332	1.00018	97.5766
42.4	378.907	1849.87	5.08823	252.119	531.798	77.7763	30.4484	46.8055	491.323	1.00019	97.6139
42.6	378.844	1849.77	5.07631	252.134	531.679	77.748	30.279	47.1486	491.314	1.00019	97.6507
42.8	378.782	1849.67	5.06445	252.148	531.559	77.7195	30.1106	47.4908	491.305	1.00019	97.6873
43	378.719	1849.58	5.05265	252.161	531.44	77.6909	29.9431	47.8317	491.297	1.00019	97.7235
43.2	378.658	1849.48	5.04095	252.174	531.319	77.6619	29.7773	48.1705	491.29	1.00019	97.7593
43.4	378.598	1849.38	5.02931	252.186	531.199	77.6329	29.6126	48.5078	491.283	1.00019	97.7947
43.6	378.537	1849.29	5.01775	252.197	531.078	77.6036	29.449	48.8436	491.276	1.00019	97.8299
43.8	378.478	1849.2	5.00629	252.208	530.957	77.5742	29.2869	49.1772	491.269	1.00019	97.8645
44	378.419	1849.11	4.99492	252.218	530.836	77.5446	29.1265	49.5085	491.263	1.00019	97.8988
44.2	378.361	1849.02	4.98364	252.228	530.715	77.5149	28.9673	49.8379	491.258	1.00019	97.9326
44.4	378.303	1848.93	4.97243	252.237	530.594	77.4851	28.8093	50.1655	491.252	1.00019	97.9662
44.6	378.246	1848.84	4.96136	252.245	530.473	77.4551	28.6534	50.4899	491.247	1.0002	97.9991
44.8	378.19	1848.75	4.95037	252.253	530.352	77.4251	28.4988	50.8122	491.242	1.0002	98.0317
45	378.134	1848.67	4.93947	252.26	530.231	77.395	28.3456	51.1324	491.238	1.0002	98.0639
45.2	378.079	1848.59	4.92867	252.267	530.111	77.3648	28.1939	51.4501	491.233	1.0002	98.0957
45.4	378.025	1848.51	4.91799	252.273	529.99	77.3345	28.0442	51.7647	491.229	1.0002	98.127
45.6	377.971	1848.43	4.9074	252.278	529.869	77.3041	27.8958	52.0771	491.226	1.0002	98.1579
45.8	377.917	1848.35	4.8969	252.283	529.749	77.2737	27.7488	52.3873	491.222	1.0002	98.1884
46	377.865	1848.27	4.88653	252.287	529.629	77.2432	27.6037	52.6944	491.219	1.0002	98.2185
46.2	377.813	1848.19	4.87625	252.291	529.509	77.2127	27.4602	52.9987	491.215	1.0002	98.2481
46.4	377.761	1848.12	4.86607	252.295	529.389	77.1822	27.3181	53.3008	491.212	1.0002	98.2773
46.6	377.71	1848.04	4.85597	252.297	529.27	77.1515	27.1773	53.6006	491.21	1.00021	98.3062
46.8	377.659	1847.97	4.84601	252.3	529.15	77.1209	27.0385	53.8969	491.207	1.00021	98.3345
47	377.61	1847.9	4.83613	252.301	529.031	77.0902	26.9012	54.1909	491.205	1.00021	98.3625
47.2	377.56	1847.83	4.82635	252.302	528.912	77.0595	26.7651	54.4827	491.203	1.00021	98.3901
47.4	377.511	1847.76	4.81665	252.303	528.793	77.0287	26.6305	54.7721	491.2	1.00021	98.4174
47.6	377.463	1847.69	4.80707	252.303	528.675	76.9979	26.4977	55.0582	491.198	1.00021	98.4441
47.8	377.415	1847.63	4.79758	252.303	528.557	76.9671	26.3662	55.3422	491.197	1.00021	98.4705
48	377.367	1847.56	4.78816	252.302	528.439	76.9363	26.2359	55.624	491.195	1.00021	98.4966
48.2	377.32	1847.5	4.77884	252.301	528.321	76.9054	26.1071	55.9034	491.193	1.00021	98.5223
48.4	377.273	1847.44	4.76962	252.299	528.203	76.8744	25.9799	56.1799	491.192	1.00021	98.5476
48.6	377.227	1847.37	4.76048	252.297	528.085	76.8434	25.8539	56.4544	491.191	1.00021	98.5725
48.8	377.181	1847.31	4.75141	252.294	527.968	76.8124	25.729	56.727	491.189	1.00022	98.5972
49	377.135	1847.25	4.74243	252.291	527.85	76.7813	25.6054	56.9972	491.188	1.00022	98.6214
49.2	377.09	1847.19	4.73354	252.287	527.733	76.7502	25.4833	57.2649	491.187	1.00022	98.6453
49.4	377.046	1847.13	4.72471	252.283	527.616	76.719	25.3622	57.5309	491.186	1.00022	98.6689
49.6	377.001	1847.08	4.71595	252.278	527.499	76.6877	25.2422	57.7951	491.185	1.00022	98.6923
49.8	376.957	1847.02	4.70727	252.273	527.381	76.6564	25.1234	58.0571	491.184	1.00022	98.7152
50	376.913	1846.97	4.69867	252.268	527.264	76.6249	25.0058	58.3171	491.184	1.00022	98.7379
50.2	376.869	1846.91	4.69012	252.262	527.147	76.5934	24.8891	58.5755	491.183	1.00022	98.7602
50.4	376.826	1846.86	4.68162	252.255	527.029	76.5618	24.7733	58.8324	491.182	1.00022	98.7824
50.6	376.783	1846.8	4.67319	252.248	526.912	76.53	24.6586	59.0875	491.182	1.00022	98.8041
50.8	376.74	1846.75	4.66482	252.241	526.794	76.4982	24.5449	59.341	491.181	1.00023	98.8256
51	376.697	1846.7	4.6565	252.233	526.676	76.4661	24.432	59.5932	491.181	1.00023	98.8469
51.2	376.655	1846.65	4.64822	252.224	526.557	76.434	24.3198	59.8442	491.181	1.00023	98.868
51.4	376.612	1846.6	4.63999	252.215	526.439	76.4017	24.2084	60.0938	491.18	1.00023	98.8887
51.6	376.57	1846.55	4.63181	252.206	526.32	76.3691	24.0979	60.3421	491.18	1.00023	98.9092
51.8	376.528	1846.5	4.62366	252.196	526.2	76.3364	23.9879	60.5896	491.18	1.00023	98.9295
52	376.486	1846.45	4.61554	252.186	526.08	76.3035	23.8785	60.8363	491.18	1.00023	98.9496
52.2	376.444	1846.4	4.60745	252.175	525.959	76.2703	23.7698	61.0821	491.18	1.00023	98.9694
52.4	376.402	1846.35	4.59938	252.163	525.837	76.2368	23.6616	61.3272	491.18	1.00023	98.9891
52.6	376.36	1846.3	4.59134	252.151	525.715	76.2031	23.5538	61.5719	491.18	1.00023	99.0085
52.8	376.318	1846.25	4.5833	252.138	525.592	76.1691	23.4463	61.8162	491.18	1.00023	99.0278
53	376.276	1846.21	4.57528	252.125	525.468	76.1347	23.3392	62.0603	491.18	1.00024	99.0469
53.2	376.234	1846.16	4.56726	252.111	525.342	76.0999	23.2323	62.3043	491.18	1.00024	99.0659
53.4	376.191	1846.11	4.55923	252.096	525.216	76.0647	23.1255	62.5485	491.18	1.00024	99.0846
53.6	376.149	1846.07	4.55119	252.081	525.088	76.0291	23.0189	62.793	491.18	1.00024	99.1033
53.8	376.106	1846.02	4.54314	252.065	524.959	75.993	22.9122	63.038	491.181	1.00024	99.1218
54	376.063	1845.97	4.53506	252.048	524.827	75.9563	22.8054	63.2839	491.181	1.00024	99.1402
54.2	376.02	1845.93	4.52694	252.03	524.694	75.919	22.6983	63.5309	491.182	1.00024	99.1585
54.4	375.977	1845.88	4.51878	252.012	524.559	75.8811	22.5909	63.779	491.182	1.00024	99.1767
54.6	375.933	1845.83	4.51058	251.993	524.422	75.8426	22.4832	64.0285	491.183	1.00024	99.1948
54.8	375.888	1845.78	4.50229	251.972	524.282	75.8031	22.3747	64.2804	491.183	1.00024	99.2129
55	375.843	1845.74	4.49392	251.951	524.139	75.7628	22.2653	64.5347	491.184	1.00025	99.231
55.2	375.797	1845.69	4.48546	251.928	523.993	75.7215	22.1551	64.7916	491.185	1.00025	99.249
55.4	375.751	1845.64	4.4769	251.905	523.844	75.6793	22.0438	65.0514	491.186	1.00025	99.267
55.6	375.703	1845.59	4.4682	251.88	523.69	75.6357	21.9311	65.3153	491.187	1.00025	99.2851
55.8	375.655	1845.54	4.45933	251.853	523.531	75.5906	21.8164	65.5844	491.188	1.00025	99.3033
56	375.605	1845.49	4.45028	251.825	523.367	75.5441	21.6998	65.8585	491.189	1.00025	99.3215
56.2	375.554	1845.43	4.44103	251.795	523.198	75.4959	21.581	66.1384	491.19	1.00025	99.3399
56.4	375.502	1845.38	4.43156	251.763	523.023	75.446	21.4596	66.4248	491.192	1.00025	99.3585
56.6	375.447	1845.32	4.4217	251.728	522.838	75.393	21.3338	66.7226	491.193	1.00025	99.3774
56.8	375.39	1845.27	4.41147	251.691	522.643	75.3373	21.2037	67.0313	491.195	1.00025	99.3967
57	375.33	1845.2	4.4008	251.651	522.438	75.2784	21.0685	67.3527	491.198	1.00025	99.4164
57.2	375.267	1845.14	4.38963	251.607	522.22	75.2159	20.9275	67.6887	491.2	1.00026	99.4367
57.4	375.2	1845.07	4.37772	251.558	521.984	75.148	20.7777	68.0464	491.203	1.00026	99.4578
57.6	375.127	1845	4.36494	251.503	521.726	75.074	20.6178	68.4293	491.206	1.00026	99.4799
57.8	375.049	1844.92	4.35129	251.443	521.447	74.9936	20.4477	68.8376	491.21	1.00026	99.5029
58	374.965	1844.83	4.33666	251.375	521.145	74.9063	20.2662	69.274	491.215	1.00026	99.527
58.2	374.875	1844.74	4.32094	251.3	520.814	74.8109	20.0721	69.7421	491.22	1.00026	99.5522
58.4	374.774	1844.63	4.30352	251.213	520.44	74.7028	19.8582	70.2591	491.226	1.00026	99.579
58.6	374.664	1844.52	4.28476	251.115	520.031	74.5845	19.6292	70.8142	491.233	1.00026	99.607
58.8	374.546	1844.39	4.26463	251.006	519.585	74.4554	19.3848	71.4078	491.242	1.00026	99.6359
59	374.42	1844.26	4.24312	250.885	519.101	74.315	19.125	72.0402	491.252	1.00026	99.6658
59.2	374.283	1844.11	4.22002	250.749	518.571	74.1614	18.8479	72.7162	491.263	1.00026	99.6964
59.4	374.136	1843.95	4.19533	250.597	517.992	73.9935	18.5539	73.435	491.277	1.00027	99.7274
59.6	373.981	1843.78	4.16948	250.431	517.375	73.8145	18.2482	74.184	491.292	1.00027	99.7583
59.8	373.82	1843.6	4.14259	250.252	516.722	73.625	17.9324	74.9588	491.31	1.00027	99.7887
60	373.652	1843.41	4.11483	250.061	516.034	73.4256	17.6085	75.7544	491.329	1.00027	99.8183
60.2	373.478	1843.21	4.08629	249.853	515.31	73.2159	17.2787	76.5658	491.351	1.00027	99.8462
60.4	373.3	1843	4.05739	249.634	514.56	72.9989	16.9477	77.3805	491.375	1.00027	99.8721
60.6	373.121	1842.78	4.02839	249.405	513.791	72.7769	16.6182	78.1915	491.401	1.00027	99.8958
60.8	372.941	1842.55	3.99942	249.167	513.006	72.5507	16.292	78.9937	491.429	1.00027	99.917
61	372.761	1842.32	3.97063	248.919	512.208	72.3214	15.9709	79.7828	491.46	1.00027	99.9356
61.2	372.581	1842.08	3.94221	248.661	511.394	72.0888	15.6582	80.549	491.494	1.00027	99.9502
61.4	372.4	1841.83	3.91407	248.393	510.566	71.8531	15.3521	81.2962	491.53	1.00027	99.9615
61.6	372.219	1841.57	3.88608	248.112	509.718	71.6132	15.0513	82.027	491.57	1.00028	99.9694
61.8	372.035	1841.29	3.85802	247.817	508.841	71.3669	14.7539	82.7448	491.614	1.00028	99.9735
62	371.846	1840.99	3.82961	247.501	507.923	71.1109	14.4572	83.455	491.663	1.00028	99.9734
62.2	371.641	1840.65	3.79952	247.138	506.9	70.8293	14.1503	84.178	491.722	1.00028	99.9662
62.4	371.407	1840.24	3.76603	246.705	505.706	70.5049	13.8164	84.9509	491.796	1.00028	99.9506
62.6	371.112	1839.68	3.72487	246.128	504.157	70.09	13.4177	85.851	491.9	1.00028	99.9199
62.8	370.689	1838.82	3.66764	245.251	501.866	69.4862	12.8822	87.0199	492.065	1.00028	99.8581
63	370.024	1837.4	3.57984	243.799	498.16	68.5212	12.0881	88.6948	492.346	1.00028	99.7359
63.2	368.865	1834.7	3.42908	240.962	491.218	66.723	10.8172	91.2104	492.903	1.00028	99.4369
63.4	367.669	1831.75	3.2747	237.761	483.636	64.758	9.59186	93.4722	493.531	1.00028	99.0527
63.6	366.462	1828.59	3.11946	234.238	475.531	62.6548	8.4355	95.4161	494.218	1.00028	98.5847
63.8	365.262	1825.27	2.96528	230.432	467.005	60.4393	7.36045	97.007	494.953	1.00028	98.0366
64	364.087	1821.85	2.81455	226.4	458.192	58.1486	6.37968	98.2118	495.725	1.00028	97.4157
64.2	362.973	1818.4	2.67227	222.22	449.303	55.8407	5.53228	98.9158	496.515	1.00028	96.725
64.4	361.92	1814.98	2.5383	218.025	440.542	53.5712	4.78463	99.2749	497.305	1.00028	96.0012
64.6	360.929	1811.62	2.41314	213.865	431.991	51.3645	4.13061	99.3267	498.085	1.00028	95.2566
64.8	360.001	1808.32	2.29693	209.78	423.711	49.2392	3.56268	99.11	498.853	1.00029	94.5014
65	359.132	1805.08	2.18949	205.796	415.735	47.2075	3.07201	98.6643	499.606	1.00029	93.7438
65.2	358.324	1801.85	2.09201	201.947	408.121	45.2975	2.66306	97.9832	500.348	1.00029	92.9898
65.4	357.543	1798.53	2.00067	198.163	400.682	43.4667	2.3052	97.1377	501.101	1.00029	92.2337
65.6	356.756	1794.94	1.91273	194.338	393.184	41.6717	1.9852	96.1141	501.898	1.00029	91.4563
65.8	355.896	1790.66	1.82273	190.202	385.072	39.8099	1.68538	94.8195	502.82	1.00029	90.6032
66	354.857	1785.03	1.72246	185.314	375.453	37.7175	1.38392	93.076	503.997	1.00029	89.5819
66.2	353.369	1776.08	1.59125	178.35	361.72	34.9405	1.0502	90.2123	505.812	1.00029	88.0964
66.4	351.889	1766.54	1.46458	170.972	347.38	32.1575	0.786506	86.8126	507.733	1.00029	86.4628
66.6	350.424	1756.47	1.34419	163.395	332.78	29.4513	0.578243	83.0621	509.721	1.00029	84.7348
66.8	348.98	1745.94	1.23074	155.704	318.06	26.856	0.417431	79.0434	511.752	1.00029	82.9294
67	347.558	1734.96	1.12428	147.947	303.303	24.3877	0.295943	74.8217	513.804	1.00029	81.0557
67.2	346.162	1723.55	1.02528	140.169	288.58	22.0724	0.208182	70.452	515.853	1.00029	79.1169
67.4	344.794	1711.7	0.934035	132.433	273.994	19.9346	0.146761	66.0141	517.86	1.00029	77.1222
67.6	343.45	1699.53	0.849023	124.781	259.591	17.9486	0.101524	61.5785	519.805	1.00029	75.0918
67.8	342.131	1687.08	0.770018	117.245	245.423	16.1142	0.0688863	57.1855	521.663	1.00029	73.034
68	340.837	1674.37	0.69679	109.856	231.534	14.4292	0.0458349	52.8706	523.412	1.00029	70.9573
68.2	339.569	1661.46	0.629099	102.642	217.967	12.8899	0.0299036	48.6652	525.029	1.00029	68.8697
68.4	338.336	1648.35	0.567962	95.6888	204.866	11.5239	0.0199225	44.6405	526.442	1.00029	66.7816
68.6	337.133	1635.13	0.511777	88.9755	192.186	10.288	0.013041	40.7889	527.661	1.00029	64.7035
68.8	335.959	1621.85	0.460161	82.5112	179.938	9.17056	0.00835605	37.1195	528.673	1.00029	62.6416
69	334.815	1608.54	0.412864	76.3084	168.141	8.16342	0.00524236	33.6426	529.46	1.00029	60.602
69.2	333.704	1595.25	0.369634	70.3775	156.811	7.25823	0.00322112	30.3658	530.008	1.00029	58.5904
69.4	332.627	1582.02	0.330588	64.7567	146.01	6.4554	0.0019833	27.316	530.278	1.00029	56.6161
69.6	331.589	1568.9	0.295585	59.4713	135.78	5.74834	0.00123671	24.5083	530.238	1.00029	54.6882
69.8	330.585	1555.92	0.263743	54.4736	126.04	5.11406	0.000752119	21.905	529.928	1.00029	52.8041
70	329.613	1543.11	0.234844	49.7631	116.788	4.546	0.000446455	19.5021	529.345	1.00029	50.9667
70.2	328.676	1530.5	0.208679	45.3377	108.023	4.03799	0.000258784	17.2948	528.491	1.00029	49.1781
70.4	327.773	1518.11	0.185042	41.1939	99.7386	3.58428	0.00014649	15.2768	527.369	1.00029	47.4404
70.6	326.91	1506.04	0.16415	37.3805	92.0222	3.18783	8.55721e-05	13.4744	525.937	1.00029	45.7655
70.8	326.086	1494.3	0.145449	33.8527	84.8025	2.83581	4.93776e-05	11.8519	524.249	1.00029	44.1484
71	325.299	1482.93	0.128641	30.5873	78.0466	2.52126	2.76025e-05	10.3886	522.344	1.00029	42.5876
71.2	324.554	1472	0.113632	27.5875	71.7724	2.24146	1.49595e-05	9.07935	520.256	1.00029	41.0899
71.4	323.857	1461.59	0.100407	24.8724	66.0307	1.99543	7.88426e-06	7.92534	518.029	1.00029	39.6719
71.6	323.217	1451.78	0.0890598	22.4821	60.9155	1.78438	4.1117e-06	6.93648	515.713	1.00029	38.3634
71.8	322.47	1439.57	0.0778805	20.0681	55.5658	1.58158	2.09891e-06	5.98431	512.531	1.00029	36.9717
72	321.736	1427.44	0.0676449	17.7987	50.4544	1.39535	1.01177e-06	5.11885	508.968	1.00029	35.5794
72.2	321.019	1415.34	0.0584549	15.7111	45.662	1.22773	4.60692e-07	4.35036	505.05	1.00029	34.2127
72.4	320.323	1403.33	0.050297	13.8135	41.215	1.07833	1.98566e-07	3.67741	500.801	1.00029	32.8798
72.6	319.649	1391.45	0.0430907	12.0978	37.1067	0.945438	8.17231e-08	3.09203	496.246	1.00029	31.5791
72.8	318.998	1379.75	0.0367728	10.5584	33.3327	0.827808	3.29837e-08	2.58799	491.392	1.00029	30.3094
73	318.373	1368.26	0.0313823	9.21081	29.9326	0.725946	1.47807e-08	2.16768	486.224	1.00029	29.0732
73.2	317.771	1356.97	0.0266579	8.00608	26.8184	0.635338	6.16103e-09	1.80642	480.839	1.00029	27.8622
73.4	317.191	1345.89	0.0225359	6.93364	23.9749	0.554889	2.42125e-09	1.49764	475.273	1.00029	26.6749
73.6	316.632	1335.04	0.0189569	5.98312	21.3867	0.483594	9.0531e-10	1.23524	469.562	1.00029	25.5102
73.8	316.095	1324.42	0.0158648	5.14438	19.038	0.420535	3.24194e-10	1.01355	463.749	1.00029	24.3674
74	315.579	1314.07	0.0132202	4.41054	16.9202	0.365086	1.15624e-10	0.828335	457.874	1.00029	23.2467
74.2	315.089	1304.05	0.0110254	3.7848	15.0481	0.317387	4.73226e-11	0.678608	451.997	1.00029	22.1518
74.4	314.619	1294.32	0.00914792	3.23706	13.3594	0.275247	1.77857e-11	0.553106	446.172	1.00029	21.0786
74.6	314.168	1284.88	0.00755053	2.7594	11.8397	0.238101	6.28032e-12	0.448483	440.441	1.00029	20.0279
74.8	313.737	1275.75	0.00619911	2.34442	10.4752	0.205432	2.10901e-12	0.361742	434.84	1.00029	19.0005
75	313.325	1266.95	0.00506235	1.98525	9.25287	0.176766	6.77907e-13	0.290218	429.405	1.00029	17.9976
75.2	312.931	1258.5	0.00411276	1.67581	8.16105	0.151693	2.10966e-13	0.23163	424.171	1.00029	17.0205
75.4	312.562	1250.55	0.00335255	1.4182	7.21107	0.130415	8.05502e-14	0.185738	419.241	1.00029	16.078
75.6	312.217	1243.21	0.00272052	1.19702	6.36704	0.111839	2.74545e-14	0.148155	414.651	1.00029	15.1694
75.8	311.919	1237.04	0.00221714	1.01489	5.65267	0.096217	8.68627e-15	0.118515	410.713	1.00029	14.3334
76	311.651	1231.46	0.00181242	0.86354	5.03944	0.0830077	2.56961e-15	0.0950047	407.198	1.00029	13.5606
76.2	311.37	1225.26	0.00146293	0.728763	4.46746	0.0711702	5.51789e-16	0.0752029	403.573	1.00029	12.8001
76.4	311.033	1217.36	0.00113205	0.596921	3.87457	0.0596018	5.51089e-17	0.0570724	399.318	1.00029	11.978
76.6	310.706	1209.67	0.000876232	0.488623	3.35801	0.0498414	1.06715e-17	0.0433211	395.358	1.00029	11.1856
76.8	310.39	1202.19	0.000673202	0.397828	2.90122	0.0414628	1.30578e-18	0.0325828	391.676	1.00029	10.4212
77	310.081	1194.88	0.00051178	0.321519	2.49614	0.0342546	1.08172e-19	0.0241835	388.27	1.00029	9.68483
77.2	309.781	1187.76	0.000384797	0.257816	2.1381	0.0280891	6.41039e-21	0.0176934	385.142	1.00029	8.97757
77.4	309.487	1180.81	0.000286018	0.205021	1.82279	0.0228487	0	0.0127451	382.295	1.00029	8.30045
77.6	309.2	1174.04	0.000210078	0.161612	1.54622	0.0184254	0	0.00902714	379.727	1.00029	7.65441
77.8	308.919	1167.46	0.000153717	0.126856	1.30771	0.0147796	0	0.00634614	377.456	1.00029	7.04356
78	308.643	1161.06	0.000112368	0.0993317	1.10353	0.0118078	0	0.00444332	375.475	1.00029	6.46981
78.2	308.367	1154.71	8.08089e-05	0.0768406	0.924085	0.00931879	0	0.00304016	373.709	1.00029	5.92272
78.4	308.095	1148.53	5.72947e-05	0.0588385	0.769162	0.00727376	0	0.00203501	372.172	1.00029	5.40865
78.6	307.828	1142.54	4.01148e-05	0.0446459	0.636726	0.0056171	0	0.0013341	370.854	1.00029	4.92877
78.8	307.562	1136.69	2.76499e-05	0.0335066	0.523472	0.00428209	0	0.000852973	369.721	1.00029	4.48026
79	307.297	1130.97	1.87422e-05	0.0248642	0.427236	0.00321895	0	0.000530842	368.755	1.00029	4.06251
79.2	307.033	1125.39	1.28268e-05	0.0185383	0.348554	0.00241848	0	0.000334527	367.959	1.00029	3.68059
79.4	306.768	1119.92	8.63167e-06	0.0136848	0.282373	0.00179192	0	0.00020534	367.281	1.00029	3.32745
79.6	306.503	1114.56	5.69364e-06	0.00999057	0.226968	0.00130646	0	0.000122184	366.702	1.00029	3.00155
79.8	306.236	1109.3	3.67559e-06	0.00721348	0.180939	0.000935978	0	7.03245e-05	366.206	1.00029	2.70167
80	305.967	1104.13	2.3181e-06	0.00515225	0.14301	0.000657915	0	3.90657e-05	365.778	1.00029	2.42652

## Sheet: scenarios
depth	diag1	diag2	diag3	diag4
0	0	1	0	0
0.2	-1.72298e-05	0.999415	1.02313e-05	1.08983
0.4	-3.44595e-05	0.998829	2.04625e-05	2.17966
0.6	-5.68193e-05	0.998159	3.28723e-05	3.72665
0.8	-8.00694e-05	0.997473	4.56601e-05	5.35298
1	-0.000103319	0.996787	5.84479e-05	6.97931
1.2	-0.000128053	0.996081	7.18751e-05	9.05061
1.4	-0.000155622	0.995334	8.65245e-05	11.9724
1.6	-0.000183191	0.994586	0.000101174	14.8943
1.8	-0.000213838	0.993798	0.000117189	18.4615
2	-0.000246152	0.992988	0.000133944	22.3782
2.2	-0.000278496	0.992177	0.000150713	26.2977
2.4	-0.000315903	0.991304	0.000169823	30.6818
2.6	-0.000353309	0.990431	0.000188934	35.0659
2.8	-0.000392935	0.989533	0.000209127	39.5327
3	-0.000435726	0.988598	0.000230866	44.1176
3.2	-0.000478516	0.987663	0.000252604	48.7025
3.4	-0.00052616	0.986677	0.000276872	53.3462
3.6	-0.000574563	0.985682	0.000301535	57.9991
3.8	-0.000625051	0.984666	0.000327371	62.6529
4	-0.000679226	0.983613	0.00035528	67.3083
4.2	-0.000733401	0.98256	0.000383189	71.9637
4.4	-0.00079285	0.981457	0.000414332	76.5926
4.6	-0.000852887	0.980348	0.000445835	81.2186
4.8	-0.000915734	0.979215	0.000479234	85.8233
5	-0.000981655	0.978053	0.000514705	90.4049
5.2	-0.00104812	0.976887	0.000550584	94.9818
5.4	-0.00111989	0.975675	0.000590425	99.5123
5.6	-0.00119165	0.974464	0.000630266	104.043
5.8	-0.0012677	0.973217	0.000673683	108.533
6	-0.00134521	0.971959	0.000718322	113.01
6.2	-0.00142513	0.970681	0.000765229	117.463
6.4	-0.00150824	0.969379	0.000815123	121.885
6.6	-0.00159217	0.96807	0.000865884	126.299
6.8	-0.00168069	0.966727	0.000921516	130.666
7	-0.00176921	0.965384	0.000977149	135.033
7.2	-0.00186241	0.964007	0.00103842	139.352
7.4	-0.00195612	0.962626	0.0011003	143.665
7.6	-0.00205322	0.961221	0.00116681	147.942
7.8	-0.00215189	0.959806	0.00123548	152.202
8	-0.00225287	0.958374	0.00130776	156.436
8.2	-0.00235624	0.956927	0.00138377	160.643
8.4	-0.00246108	0.955469	0.00146239	164.833
8.6	-0.00256888	0.953992	0.00154632	168.988
8.8	-0.0026775	0.95251	0.00163191	173.133
9	-0.00278947	0.951006	0.00172437	177.237
9.2	-0.00290178	0.9495	0.0018176	181.337
9.4	-0.00301766	0.947971	0.0019192	185.391
9.6	-0.00313355	0.946443	0.00202079	189.445
9.8	-0.00325308	0.944892	0.00213214	193.449
10	-0.00337262	0.943341	0.00224351	197.453
10.2	-0.00349535	0.94177	0.00236462	201.412
10.4	-0.00361829	0.940198	0.00248638	205.368
10.6	-0.00374408	0.93861	0.00261806	209.281
10.8	-0.00387019	0.937019	0.00275087	213.189
11	-0.00399889	0.935414	0.00289396	217.056
11.2	-0.00412795	0.933806	0.00303845	220.917
11.4	-0.00425942	0.932185	0.00319382	224.738
11.6	-0.00439121	0.930561	0.00335063	228.553
11.8	-0.00452529	0.928925	0.00351916	232.328
12	-0.00465961	0.927287	0.0036889	236.099
12.2	-0.00479615	0.925637	0.0038715	239.828
12.4	-0.00493283	0.923986	0.00405493	243.554
12.6	-0.00507164	0.922324	0.00425232	247.239
12.8	-0.00521063	0.920661	0.00445103	250.92
13	-0.00535142	0.918988	0.0046631	254.563
13.2	-0.00549254	0.917313	0.00487798	258.199
13.4	-0.00563514	0.91563	0.00510525	261.803
13.6	-0.00577822	0.913945	0.00533717	265.395
13.8	-0.00592245	0.912255	0.00558013	268.96
14	-0.00606731	0.910561	0.00582991	272.51
14.2	-0.00621301	0.908863	0.00608901	276.039
14.4	-0.00635944	0.907162	0.00635745	279.549
14.6	-0.00650643	0.905459	0.00663312	283.043
14.8	-0.00665422	0.903752	0.00692093	286.514
15	-0.00680232	0.902045	0.00721354	289.976
15.2	-0.00695123	0.900334	0.00752142	293.411
15.4	-0.00710029	0.898624	0.00783238	296.841
15.6	-0.00725001	0.896912	0.00815988	300.246
15.8	-0.00739985	0.895201	0.0084918	303.643
16	-0.00755004	0.89349	0.00883718	307.022
16.2	-0.00770036	0.89178	0.00919059	310.391
16.4	-0.00785084	0.890072	0.00955404	313.746
16.6	-0.00800146	0.888365	0.00992927	317.087
16.8	-0.00815215	0.886659	0.0103109	320.42
17	-0.00830317	0.884953	0.0107077	323.734
17.2	-0.00845443	0.883245	0.0111081	327.042
17.4	-0.00860757	0.881518	0.0115215	330.331
17.6	-0.00876186	0.87978	0.0119383	333.613
17.8	-0.00891871	0.878015	0.0123626	336.881
18	-0.00907833	0.876219	0.0127912	340.136
18.2	-0.00924027	0.874399	0.0132235	343.382
18.4	-0.00940711	0.872527	0.0136603	346.611
18.6	-0.00957555	0.870637	0.0140985	349.835
18.8	-0.00975075	0.868675	0.0145408	353.038
19	-0.00992815	0.866689	0.0149842	356.235
19.2	-0.0101108	0.864648	0.0154301	359.418
19.4	-0.0102974	0.862565	0.0158781	362.589
19.6	-0.0104873	0.86045	0.0163278	365.75
19.8	-0.0106823	0.858282	0.016782	368.895
20	-0.0108789	0.856098	0.0172377	372.034
20.2	-0.0110804	0.853867	0.0176991	375.154
20.4	-0.011284	0.851618	0.018163	378.267
20.6	-0.0114906	0.849338	0.0186308	381.367
20.8	-0.0117006	0.847029	0.0191031	384.453
21	-0.0119121	0.844707	0.0195776	387.533
21.2	-0.0121279	0.842346	0.0200586	390.594
21.4	-0.012345	0.839975	0.0205418	393.648
21.6	-0.012565	0.83758	0.02103	396.688
21.8	-0.0127872	0.835168	0.0215224	399.717
22	-0.0130109	0.832745	0.0220177	402.737
22.2	-0.0132375	0.830301	0.0225197	405.74
22.4	-0.0134651	0.82785	0.023024	408.736
22.6	-0.0136948	0.825386	0.023534	411.717
22.8	-0.0139258	0.822915	0.0240482	414.688
23	-0.0141579	0.820439	0.0245658	417.65
23.2	-0.0143918	0.817955	0.0250902	420.595
23.4	-0.0146262	0.81547	0.0256172	423.533
23.6	-0.0148619	0.812982	0.0261501	426.457
23.8	-0.0150982	0.810495	0.0266875	429.37
24	-0.015335	0.808009	0.0272281	432.275
24.2	-0.0155726	0.805527	0.027776	435.162
24.4	-0.0158104	0.803048	0.0283267	438.043
24.6	-0.0160484	0.800574	0.0288828	440.91
24.8	-0.0162867	0.798109	0.029444	443.766
25	-0.0165249	0.795648	0.030008	446.614
25.2	-0.016763	0.7932	0.0305793	449.445
25.4	-0.017001	0.79076	0.0311537	452.268
25.6	-0.0172388	0.788329	0.0317326	455.081
25.8	-0.0174761	0.785913	0.0323171	457.879
26	-0.0177131	0.783505	0.0329045	460.671
26.2	-0.0179495	0.781113	0.0334978	463.447
26.4	-0.0181854	0.778733	0.0340949	466.213
26.6	-0.0184208	0.776362	0.0346951	468.972
26.8	-0.0186552	0.774012	0.0353017	471.713
27	-0.0188892	0.771671	0.0359109	474.448
27.2	-0.0191224	0.769345	0.0365242	477.171
27.4	-0.0193547	0.767036	0.0371422	479.881
27.6	-0.0195865	0.764736	0.0377627	482.584
27.8	-0.0198173	0.762455	0.0383881	485.272
28	-0.0200473	0.760187	0.0390168	487.95
28.2	-0.0202767	0.757928	0.0396478	490.621
28.4	-0.0205049	0.75569	0.040284	493.275
28.6	-0.0207326	0.753462	0.0409224	495.921
28.8	-0.0209596	0.751245	0.0415636	498.558
29	-0.0211855	0.749045	0.0422087	501.18
29.2	-0.021411	0.746853	0.0428557	503.795
29.4	-0.0216357	0.744674	0.0435058	506.398
29.6	-0.0218596	0.742508	0.0441587	508.989
29.8	-0.0220831	0.740349	0.0448133	511.573
30	-0.0223059	0.738203	0.0454708	514.142
30.2	-0.0225282	0.736065	0.0461303	516.702
30.4	-0.0227501	0.733934	0.0467912	519.254
30.6	-0.0229715	0.731814	0.0474548	521.791
30.8	-0.0231927	0.7297	0.0481196	524.319
31	-0.0234136	0.72759	0.0487856	526.84
31.2	-0.0236342	0.725489	0.0494536	529.344
31.4	-0.0238548	0.72339	0.0501224	531.842
31.6	-0.0240754	0.721294	0.0507921	534.33
31.8	-0.0242961	0.719203	0.0514629	536.804
32	-0.0245169	0.717111	0.0521341	539.27
32.2	-0.024738	0.715021	0.0528059	541.726
32.4	-0.0249597	0.71293	0.053478	544.169
32.6	-0.0251818	0.710836	0.0541501	546.604
32.8	-0.0254045	0.708741	0.0548221	549.029
33	-0.0256282	0.706639	0.0554936	551.442
33.2	-0.0258526	0.704533	0.0561647	553.846
33.4	-0.0260782	0.70242	0.056835	556.24
33.6	-0.0263053	0.700296	0.057504	558.622
33.8	-0.0265336	0.698163	0.058172	560.996
34	-0.0267635	0.696019	0.0588383	563.359
34.2	-0.0269956	0.693858	0.0595024	565.71
34.4	-0.0272293	0.691686	0.0601648	568.054
34.6	-0.0274652	0.689497	0.0608249	570.387
34.8	-0.0277039	0.687286	0.0614818	572.708
35	-0.0279447	0.68506	0.0621364	575.021
35.2	-0.028188	0.682814	0.0627881	577.325
35.4	-0.0284349	0.680541	0.0634355	579.615
35.6	-0.0286842	0.678251	0.0640802	581.899
35.8	-0.0289364	0.675938	0.0647213	584.172
36	-0.0291929	0.673594	0.0653572	586.433
36.2	-0.0294521	0.671229	0.0659898	588.686
36.4	-0.0297144	0.668843	0.0666186	590.931
36.6	-0.0299818	0.666419	0.067241	593.162
36.8	-0.0302522	0.663975	0.0678597	595.386
37	-0.0305256	0.661509	0.0684744	597.602
37.2	-0.0308048	0.659004	0.0690818	599.803
37.4	-0.0310873	0.656477	0.0696849	601.997
37.6	-0.031373	0.653929	0.0702838	604.183
37.8	-0.0316643	0.651347	0.0708754	606.357
38	-0.0319594	0.648741	0.0714619	608.521
38.2	-0.0322578	0.646115	0.072044	610.678
38.4	-0.032561	0.643463	0.0726195	612.824
38.6	-0.0328685	0.640788	0.073189	614.959
38.8	-0.0331791	0.638098	0.0737542	617.087
39	-0.0334937	0.63539	0.074314	619.205
39.2	-0.0338125	0.632665	0.0748674	621.311
39.4	-0.0341341	0.629932	0.0754169	623.41
39.6	-0.0344582	0.627191	0.0759625	625.501
39.8	-0.0347863	0.624444	0.076502	627.579
40	-0.0351161	0.621699	0.0770386	629.649
40.2	-0.0354476	0.618956	0.0775723	631.711
40.4	-0.035781	0.616224	0.0781023	633.762
40.6	-0.0361152	0.613507	0.0786304	635.803
40.8	-0.0364498	0.610804	0.0791571	637.837
41	-0.0367846	0.608123	0.0796826	639.861
41.2	-0.0371192	0.60547	0.0802071	641.874
41.4	-0.0374535	0.602839	0.0807311	643.88
41.6	-0.0377874	0.60023	0.0812547	645.878
41.8	-0.0381202	0.597661	0.0817782	647.863
42	-0.0384522	0.595119	0.0823019	649.841
42.2	-0.0387832	0.592603	0.0828258	651.81
42.4	-0.0391129	0.590123	0.0833504	653.77
42.6	-0.0394408	0.587682	0.083876	655.72
42.8	-0.0397674	0.585271	0.0844024	657.662
43	-0.0400925	0.582889	0.0849298	659.596
43.2	-0.0404149	0.580559	0.0854592	661.518
43.4	-0.0407357	0.578259	0.08599	663.433
43.6	-0.0410546	0.575991	0.0865222	665.34
43.8	-0.0413711	0.573765	0.0870565	667.237
44	-0.041685	0.571582	0.0875932	669.124
44.2	-0.0419968	0.569431	0.0881317	671.004
44.4	-0.0423065	0.567312	0.0886722	672.876
44.6	-0.0426129	0.565244	0.0892159	674.736
44.8	-0.0429169	0.56321	0.0897619	676.589
45	-0.0432186	0.561208	0.0903101	678.434
45.2	-0.0435177	0.559243	0.090861	680.27
45.4	-0.0438135	0.557323	0.0914154	682.096
45.6	-0.0441069	0.555434	0.0919721	683.915
45.8	-0.044398	0.553576	0.0925314	685.726
46	-0.0446858	0.551759	0.0930941	687.526
46.2	-0.0449708	0.549978	0.0936599	689.318
46.4	-0.0452535	0.548226	0.0942284	691.103
46.6	-0.0455337	0.546503	0.0947994	692.88
46.8	-0.0458105	0.544822	0.0953745	694.646
47	-0.0460848	0.54317	0.0959524	696.404
47.2	-0.0463567	0.541544	0.0965329	698.155
47.4	-0.0466263	0.539947	0.0971163	699.898
47.6	-0.0468925	0.538386	0.0977036	701.63
47.8	-0.0471565	0.536851	0.0982936	703.355
48	-0.0474183	0.535339	0.0988862	705.073
48.2	-0.0476777	0.533854	0.0994819	706.782
48.4	-0.0479341	0.5324	0.100081	708.482
48.6	-0.0481885	0.530967	0.100683	710.174
48.8	-0.0484409	0.529555	0.101287	711.859
49	-0.0486909	0.528168	0.101895	713.535
49.2	-0.0489385	0.526806	0.102506	715.202
49.4	-0.0491842	0.525463	0.103119	716.861
49.6	-0.0494281	0.524137	0.103735	718.514
49.8	-0.0496698	0.522833	0.104353	720.157
50	-0.0499095	0.521548	0.104975	721.792
50.2	-0.0501476	0.520279	0.105599	723.42
50.4	-0.0503841	0.519024	0.106225	725.04
50.6	-0.0506188	0.517788	0.106854	726.652
50.8	-0.0508518	0.516567	0.107485	728.254
51	-0.0510836	0.515357	0.108119	729.85
51.2	-0.0513141	0.514159	0.108755	731.439
51.4	-0.0515432	0.512975	0.109393	733.019
51.6	-0.051771	0.511802	0.110033	734.591
51.8	-0.0519979	0.510637	0.110676	736.156
52	-0.0522239	0.50948	0.11132	737.713
52.2	-0.0524489	0.508331	0.111966	739.263
52.4	-0.0526732	0.50719	0.112614	740.803
52.6	-0.052897	0.506053	0.113263	742.337
52.8	-0.0531204	0.50492	0.113914	743.864
53	-0.0533434	0.503791	0.114567	745.383
53.2	-0.0535663	0.502663	0.115221	746.893
53.4	-0.0537892	0.501535	0.115876	748.397
53.6	-0.0540123	0.500406	0.116533	749.893
53.8	-0.0542358	0.499276	0.11719	751.383
54	-0.05446	0.498139	0.117848	752.863
54.2	-0.054685	0.496998	0.118507	754.337
54.4	-0.0549111	0.495848	0.119166	755.803
54.6	-0.0551383	0.494691	0.119825	757.263
54.8	-0.0553676	0.493519	0.120485	758.715
55	-0.055599	0.492332	0.121144	760.159
55.2	-0.0558327	0.491128	0.121802	761.596
55.4	-0.056069	0.489907	0.12246	763.027
55.6	-0.056309	0.48866	0.123117	764.45
55.8	-0.0565536	0.487381	0.123771	765.864
56	-0.0568027	0.486071	0.124423	767.273
56.2	-0.0570569	0.484726	0.125072	768.675
56.4	-0.0573172	0.483341	0.125719	770.07
56.6	-0.0575877	0.481888	0.126358	771.457
56.8	-0.0578681	0.480371	0.126991	772.837
57	-0.05816	0.478781	0.127616	774.21
57.2	-0.0584651	0.477107	0.128231	775.577
57.4	-0.05879	0.47531	0.128831	776.937
57.6	-0.0591379	0.473371	0.129414	778.289
57.8	-0.0595089	0.471291	0.129979	779.635
58	-0.0599056	0.469056	0.130525	780.974
58.2	-0.0603312	0.466648	0.131048	782.307
58.4	-0.0608016	0.463978	0.131537	783.632
58.6	-0.0613069	0.461108	0.131999	784.95
58.8	-0.0618477	0.45804	0.132435	786.262
59	-0.0624243	0.454778	0.132843	787.569
59.2	-0.0630415	0.451305	0.133221	788.868
59.4	-0.0636987	0.447637	0.133568	790.159
59.6	-0.0643846	0.443843	0.133891	791.445
59.8	-0.0650952	0.43995	0.134194	792.725
60	-0.0658263	0.435986	0.134479	793.998
60.2	-0.0665739	0.431986	0.134747	795.264
60.4	-0.0673264	0.428003	0.135008	796.524
60.6	-0.0680776	0.424056	0.135266	797.777
60.8	-0.0688227	0.420158	0.135525	799.025
61	-0.069558	0.416316	0.13579	800.267
61.2	-0.0702753	0.412537	0.136069	801.501
61.4	-0.0709778	0.408773	0.136364	802.729
61.6	-0.0716679	0.404981	0.136675	803.951
61.8	-0.0723493	0.401105	0.137004	805.168
62	-0.0730276	0.397071	0.137352	806.379
62.2	-0.0737252	0.392559	0.137722	807.582
62.4	-0.0744795	0.387245	0.138099	808.779
62.6	-0.075373	0.380272	0.138465	809.971
62.8	-0.0765666	0.369947	0.13879	811.158
63	-0.078335	0.353353	0.139028	812.338
63.2	-0.0813739	0.3249	0.139095	813.512
63.4	-0.0845244	0.296905	0.139127	814.68
63.6	-0.0877643	0.270041	0.139144	815.842
63.8	-0.091075	0.24474	0.139155	817
64	-0.0944145	0.221459	0.139162	818.151
64.2	-0.0976783	0.201343	0.139166	819.296
64.4	-0.100808	0.183746	0.13917	820.435
64.6	-0.103766	0.168561	0.139175	821.569
64.8	-0.106521	0.155612	0.139182	822.698
65	-0.109047	0.144658	0.139194	823.821
65.2	-0.111248	0.135695	0.139214	824.938
65.4	-0.113163	0.127773	0.139241	826.05
65.6	-0.114771	0.120344	0.139277	827.156
65.8	-0.116019	0.11261	0.139319	828.258
66	-0.116846	0.103553	0.13936	829.354
66.2	-0.117194	0.0912431	0.139373	830.444
66.4	-0.117743	0.0802345	0.139377	831.529
66.6	-0.118304	0.0704324	0.139378	832.609
66.8	-0.118832	0.0617771	0.139378	833.684
67	-0.119333	0.0541669	0.139379	834.754
67.2	-0.11983	0.0475543	0.13938	835.819
67.4	-0.120333	0.041858	0.13938	836.878
67.6	-0.120844	0.036826	0.139381	837.932
67.8	-0.121369	0.0323877	0.139381	838.982
68	-0.12191	0.0284782	0.139382	840.027
68.2	-0.122473	0.0250385	0.139382	841.067
68.4	-0.123072	0.0221042	0.139383	842.102
68.6	-0.123708	0.0195181	0.139384	843.132
68.8	-0.124383	0.0172343	0.139384	844.157
69	-0.125104	0.0152198	0.139385	845.178
69.2	-0.125875	0.0134448	0.139385	846.195
69.4	-0.126708	0.0119011	0.139386	847.207
69.6	-0.127614	0.0105658	0.139387	848.213
69.8	-0.12859	0.00938456	0.139388	849.215
70	-0.129642	0.00834091	0.13939	850.213
70.2	-0.130777	0.00741998	0.139391	851.207
70.4	-0.132001	0.00660865	0.139393	852.197
70.6	-0.133344	0.00591265	0.139395	853.181
70.8	-0.134799	0.00530893	0.139397	854.162
71	-0.136357	0.00478793	0.139399	855.138
71.2	-0.137984	0.00434817	0.139402	856.11
71.4	-0.139575	0.00398577	0.139406	857.078
71.6	-0.140917	0.00369112	0.139414	858.043
71.8	-0.141218	0.00337047	0.13942	859.002
72	-0.14178	0.00306953	0.139422	859.958
72.2	-0.142321	0.00279537	0.139423	860.909
72.4	-0.142777	0.00254813	0.139424	861.857
72.6	-0.14319	0.00232445	0.139425	862.802
72.8	-0.143575	0.00212215	0.139426	863.742
73	-0.143928	0.00194202	0.139427	864.679
73.2	-0.144261	0.00177774	0.139427	865.611
73.4	-0.144581	0.00162789	0.139428	866.54
73.6	-0.144897	0.00149118	0.139428	867.466
73.8	-0.145216	0.0013665	0.139429	868.388
74	-0.145549	0.00125321	0.139429	869.307
74.2	-0.145915	0.00115199	0.13943	870.221
74.4	-0.146323	0.00105985	0.13943	871.132
74.6	-0.146786	0.000976232	0.139431	872.04
74.8	-0.147322	0.000900654	0.139432	872.945
75	-0.147954	0.000832741	0.139433	873.847
75.2	-0.148716	0.00077232	0.139434	874.745
75.4	-0.149755	0.000721728	0.139435	875.64
75.6	-0.151229	0.000681817	0.139437	876.532
75.8	-0.153355	0.000656546	0.139441	877.421
76	-0.155462	0.000644388	0.139449	878.302
76.2	-0.156695	0.000640795	0.139456	879.168
76.4	-0.156695	0.00064068	0.139456	880.009
76.6	-0.156695	0.000640536	0.139456	880.85
76.8	-0.156695	0.000640388	0.139455	881.692
77	-0.156695	0.000640253	0.139455	882.535
77.2	-0.156695	0.000640152	0.139455	883.378
77.4	-0.156695	0.000640104	0.139455	884.221
77.6	-0.156695	0.000640124	0.139454	885.065
77.8	-0.156695	0.000640233	0.139454	885.909
78	-0.156695	0.000640434	0.139454	886.754
78.2	-0.156695	0.000640702	0.139453	887.6
78.4	-0.156695	0.000641014	0.139453	888.445
78.6	-0.156695	0.000641338	0.139453	889.292
78.8	-0.156695	0.000641635	0.139452	890.139
79	-0.156695	0.00064186	0.139452	890.986
79.2	-0.156695	0.000641936	0.139452	891.834
79.4	-0.156695	0.000641843	0.139451	892.682
79.6	-0.156695	0.00064157	0.139451	893.531
79.8	-0.156695	0.000641121	0.13945	894.38
80	-0.156695	0.000640523	0.13945	895.23
